# Supplementary material for: A method for benchmarking genetic screens reveals a predominant mitochondrial bias
Source: PubMed Central journal article supplement (PMC8138267; doi:10.15252/msb.202010013), 2021-05-20
Supplement: MSB-17-e10013-s003.pdf [file MSB-17-e10013-s003.pdf]

## Expanded View Figures

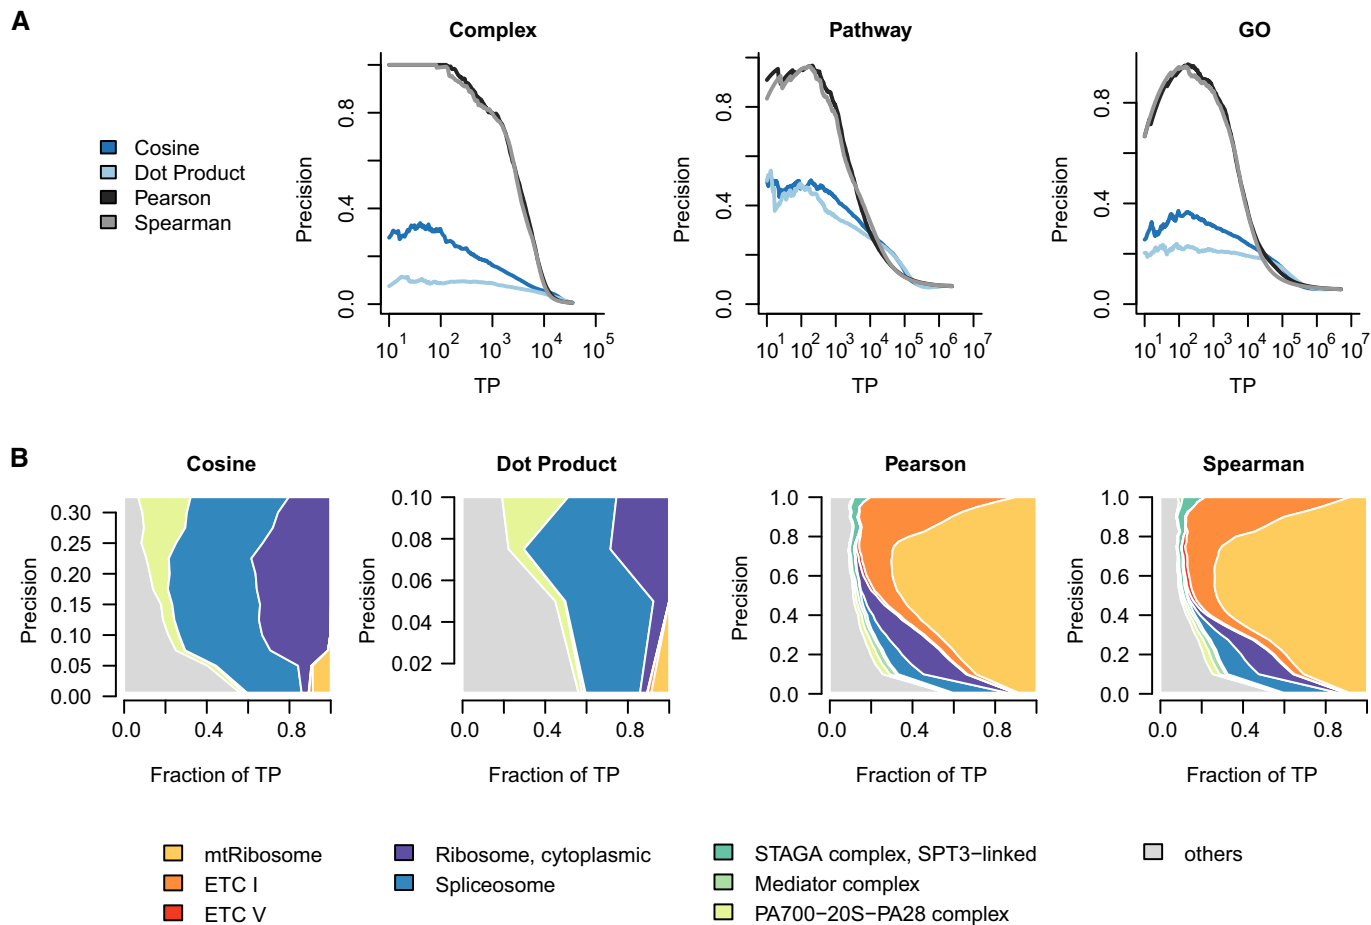

**Figure EV1. Effect of similarity measures on functional evaluation.**

Co-essentiality networks from the DepMap dataset are calculated using different similarity measures: cosine similarity, dot product similarity, Pearson correlation, and Spearman correlation.

A Gene-level performance comparison of different similarity metrics across CORUM, Pathway, and GO-BP standards.

B Contribution diversity of CORUM complexes for different similarity measures.

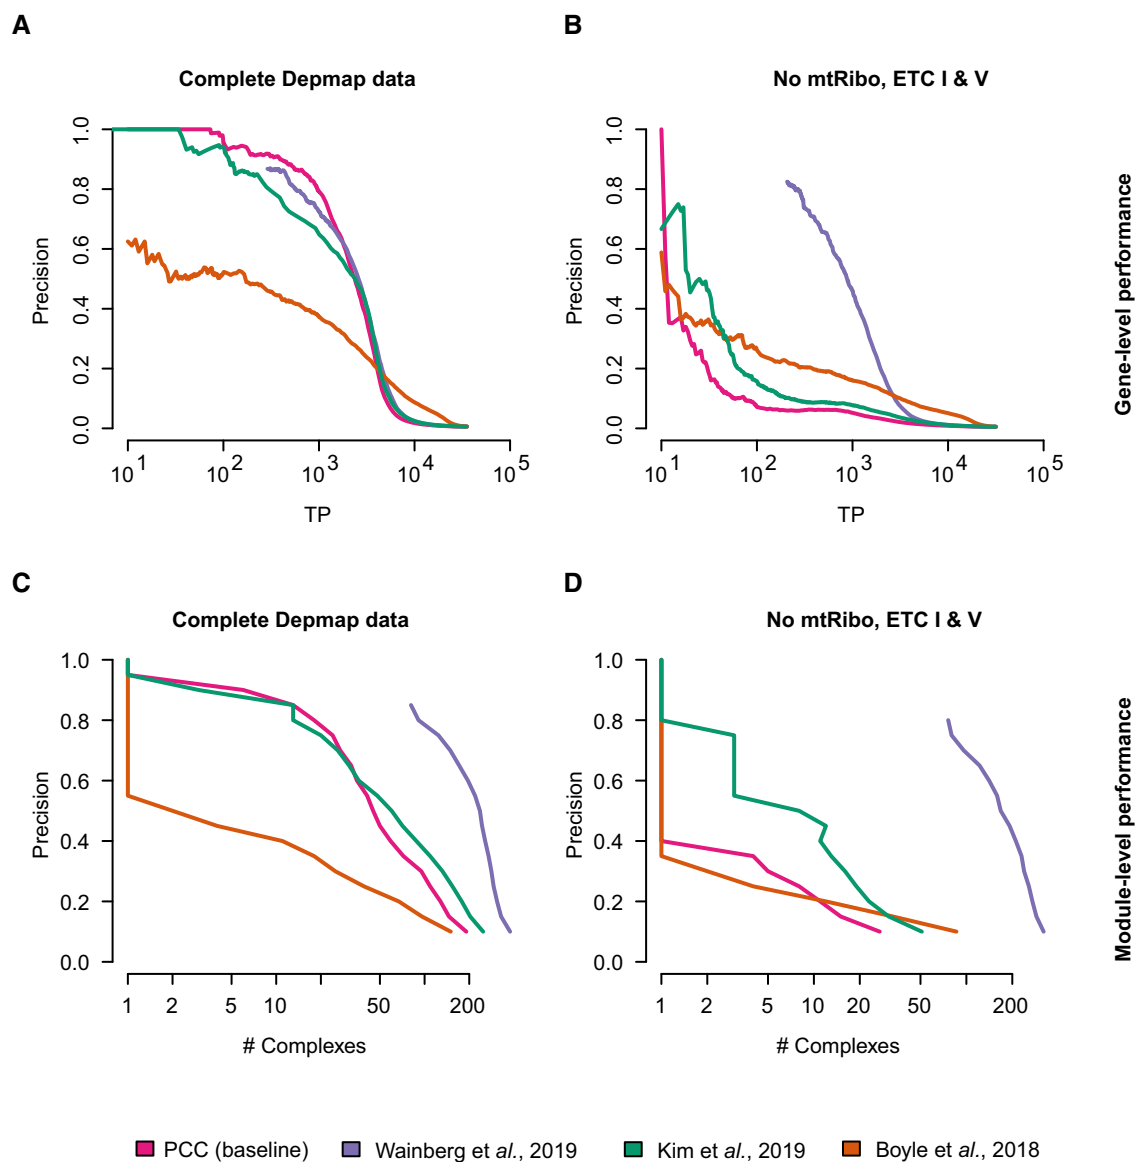

**Figure EV2. Direct comparison of alternative DepMap post-processing approaches.**

Compared are different alternative methods to infer functional relationships from DepMap 18Q3 release CERES score co-essentiality profiles and CORUM 3.0 complex relations as a standard. The methods are PCC of co-essentiality profiles as baseline data treatment (pink) and approaches published in Wainberg and colleagues (Wainberg et al, 2019) (violet), Boyle and colleagues (Boyle et al, 2018) (orange) and Kim and colleagues (Kim et al, 2019) (green).

A Gene-level performance to capture co-complex membership on the full data.

B Gene-level performance to capture co-complex membership when ETC-related complexes are removed from data and standard.

C Module-level performance to capture number of complexes with TP co-complex membership on the full data.

D Module-level performance to capture number of complexes with TP co-complex membership when ETC-related complexes are removed from data and standard.

**Figure EV3. Temporal fitness phenotype estimation on HAP1 genome-wide CRISPR screening data.**

- A Schematic illustration of data processing to estimate dropout rate across time. The contrast of a pair of sliding intermediate time points ( $M_n$ ,  $M_m$ ) is used to estimate dropout rates.
- B Fitness effects of selected complexes along the time of a screen. Shown is the median gene dropout LFC across a given complex. LFC values for each gRNA are first interpolated from 31 measurements derived from 7 independent screens between 3 and 19 days past puromycin selection (screen start). Next, gRNA-level interpolated LFC values are mean-summarized to the gene-level and finally median-summarized to the complex-level as defined by CORUM 3.0. The range of the sliding intermediate time points is indicated on top.
- C Fitness effects of the genes in a selected complex along the time of a screen.
- D, E Dropout rate estimation in an early (D) and mid/late (E) window along time. Window size is 3 days (day 4 - day 1 or day 8 - day 5). Gene-level fitness effects (LFC) comparison between sets of time points (left). The differential LFC values (y-axis) depend on LFC values measured at the time point with the strongest phenotypic effect (T18; see Materials and Methods) (middle). This dependency is normalized for, in order to estimate a dropout rate, which is independent of a gene's fitness phenotypic strength (right). Normalization is done by taking the residual from the loess fit. Gray lines show  $x = y$  diagonal.
- F Adjusted differential fitness effect (negative dropout speed) of genes for each of the selected complexes shown in Fig 2H.

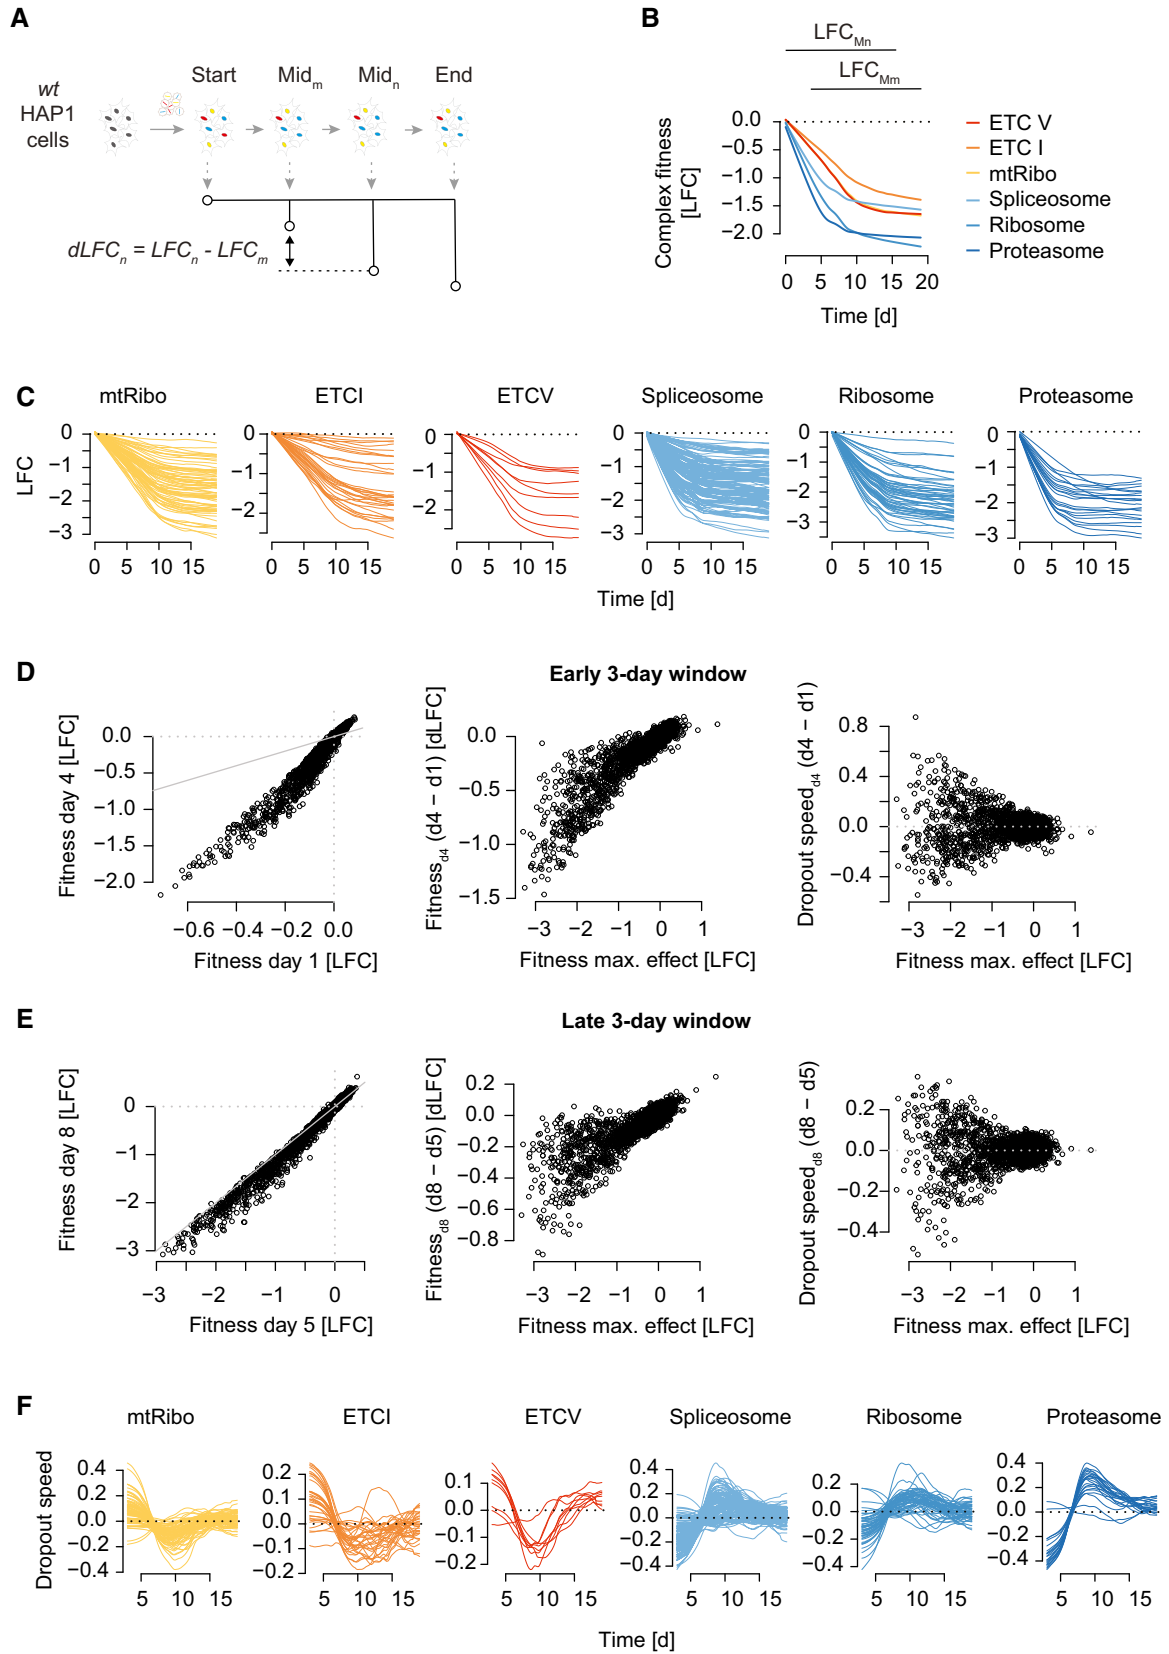

Figure EV3.
